# Supplementary material for: Investigation of the “bent sandwich-like” divalent lanthanide hydro-tris(pyrazolyl)borates Ln(TpiPr2)2 (Ln = Sm, Eu, Tm, Yb)
Source: Royal Society of Chemistry journal article supplement (doi:10.1039/c5nj00568j), 2015-01-01
Supplement: c5nj00568j1.pdf [file c5nj00568j1.pdf]

Full Paper submitted to *New Journal of Chemistry*

# Investigation of the “bent sandwich-like” divalent lanthanide pyrazolylborates $\text{Ln}(\text{Tp}^{\text{iPr}_2})_2$ (Ln = Sm, Eu, Yb)

Marcel Kühling,<sup>a</sup> Claudia Wickleder,<sup>\*b</sup> Michael J. Ferguson,<sup>c</sup> Cristian G. Hrib,<sup>a</sup> Robert McDonald,<sup>c</sup> Marcus Suta,<sup>b</sup> Liane Hilfert,<sup>a</sup> Josef Takats,<sup>\*c</sup> and Frank T. Edelman<sup>\*a</sup>

## SUPPLEMENTARY INFORMATION

---

<sup>a</sup> *Chemisches Institut der Otto-von-Guericke-Universität Magdeburg, Universitätsplatz 2, 39106 Magdeburg, Germany. E-mail: [frank.edelmann@ovgu.de](mailto:frank.edelmann@ovgu.de); Fax: +49 391 671-2933; Tel: +49 391 6758327.*

<sup>b</sup> *Universität Siegen, Anorganische Chemie, Adolf-Reichwein-Straße, 57068 Siegen, Germany. E-mail: [wickleder@chemie.uni-siegen.de](mailto:wickleder@chemie.uni-siegen.de); Fax: +49 271 740-2555; Tel: +49 271 740-4217.*

<sup>c</sup> *Department of Chemistry, University of Alberta, Edmonton, Alberta, AB, Canada T6G 2G2. E-mail: [joe.takats@ualberta.ca](mailto:joe.takats@ualberta.ca); Fax: 001 780 492-8231; Tel: 001 780 492-4944.*

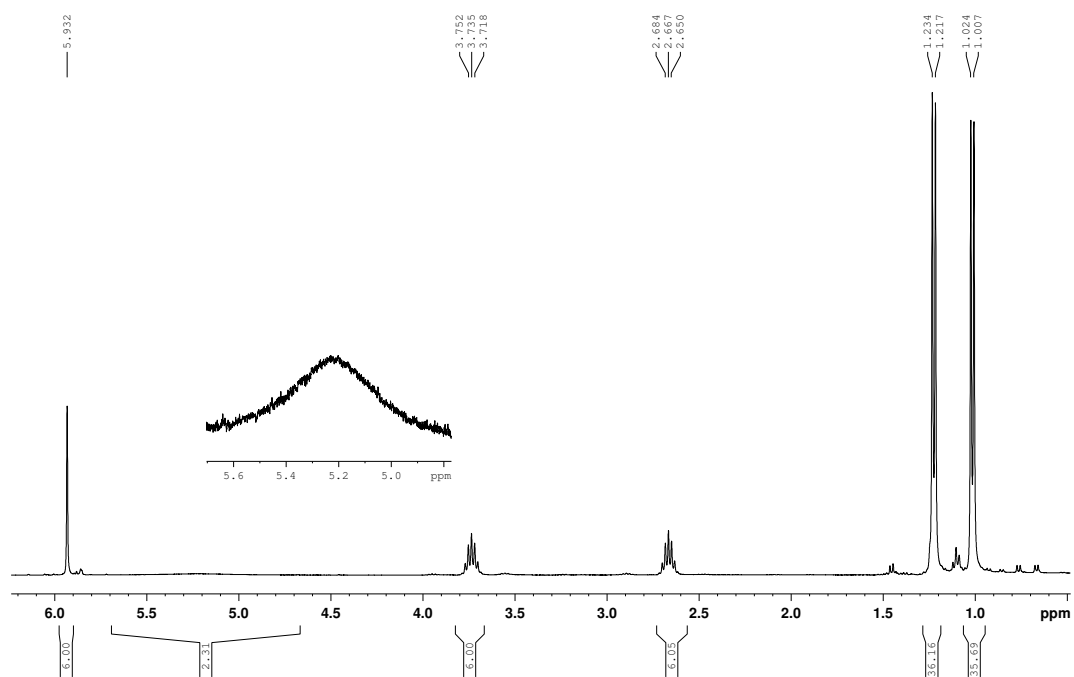

**Figure S1.**  $^1\text{H}$  NMR spectrum of  $\text{Yb}(\text{Tp}^{\text{iPr}_2})_2$  (4)

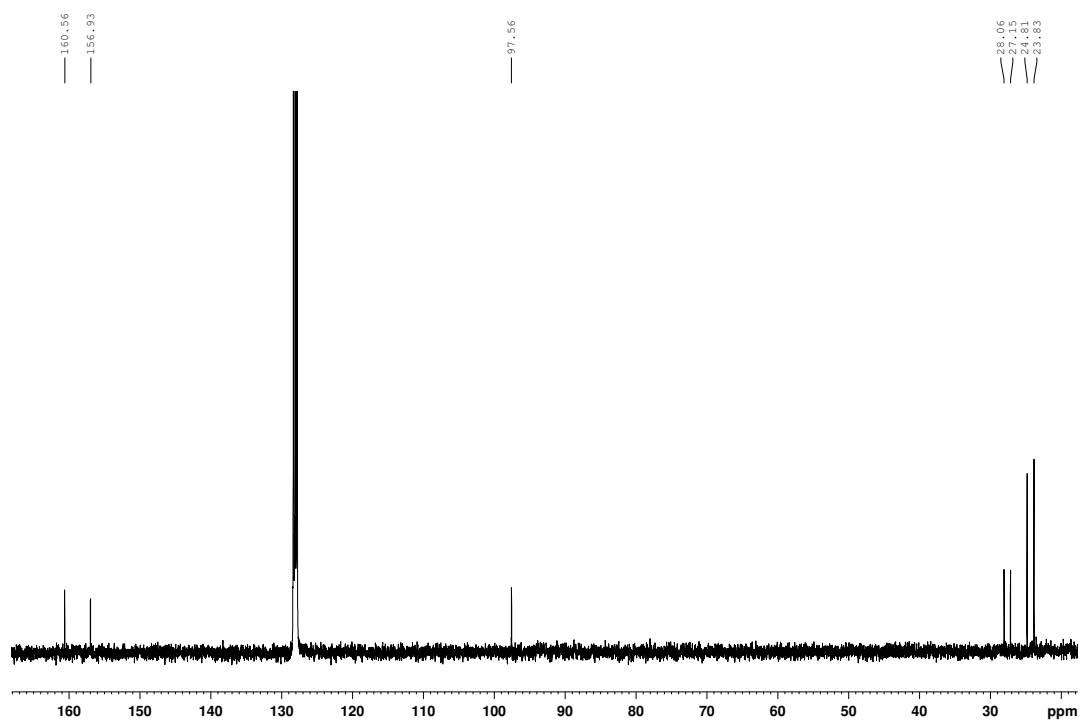

**Figure S2.**  $^{13}\text{C}$  NMR spectrum of  $\text{Yb}(\text{Tp}^{\text{iPr}_2})_2$  (4)

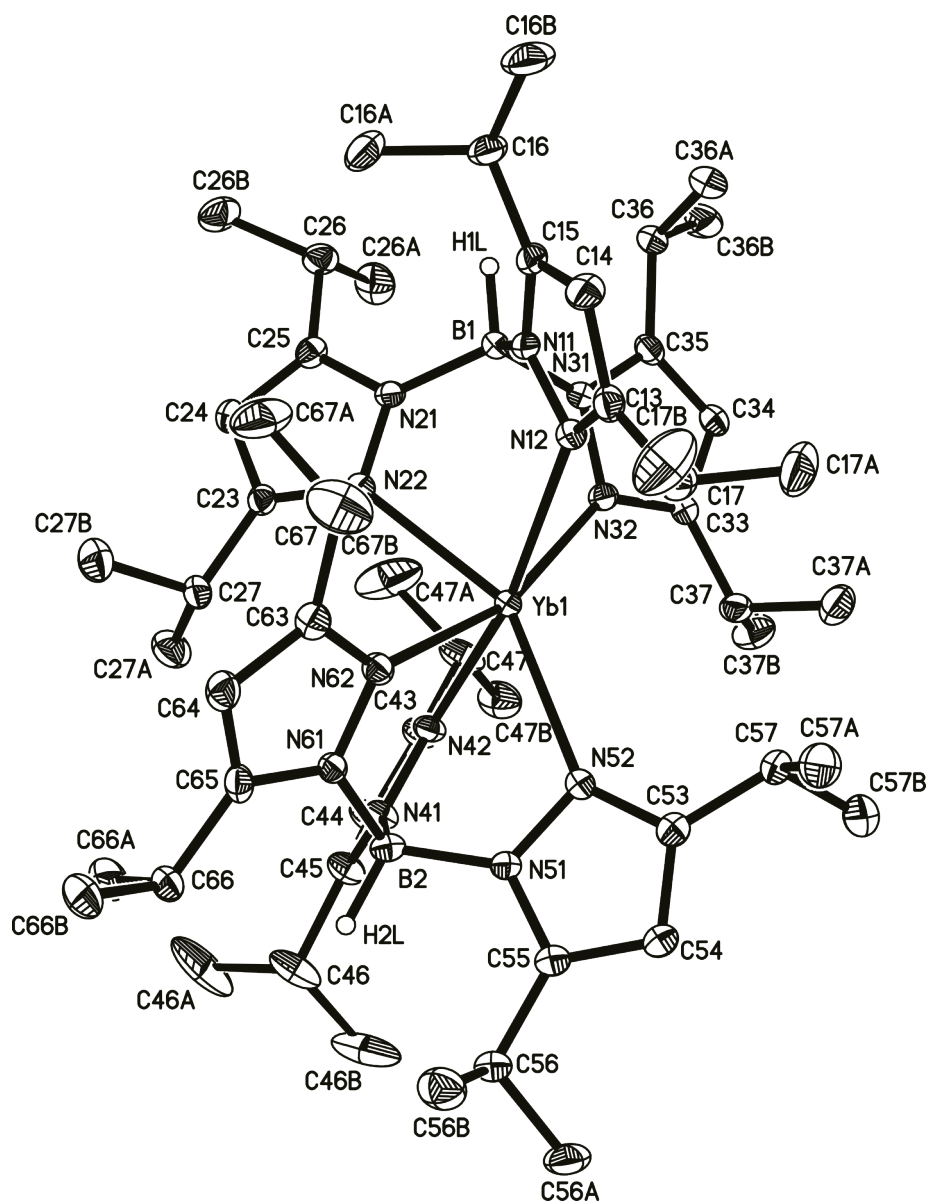

**Figure S3.** Perspective view of the  $\text{Yb}(\text{Tp}^{\text{iPr}_2})_2$  (**4**) molecule showing the atom labelling scheme. Non-hydrogen atoms are represented by Gaussian ellipsoids at the 50% probability level. Hydrogen atoms are shown with arbitrarily small thermal parameters for the B–H groups, and are not shown for the remaining groups.

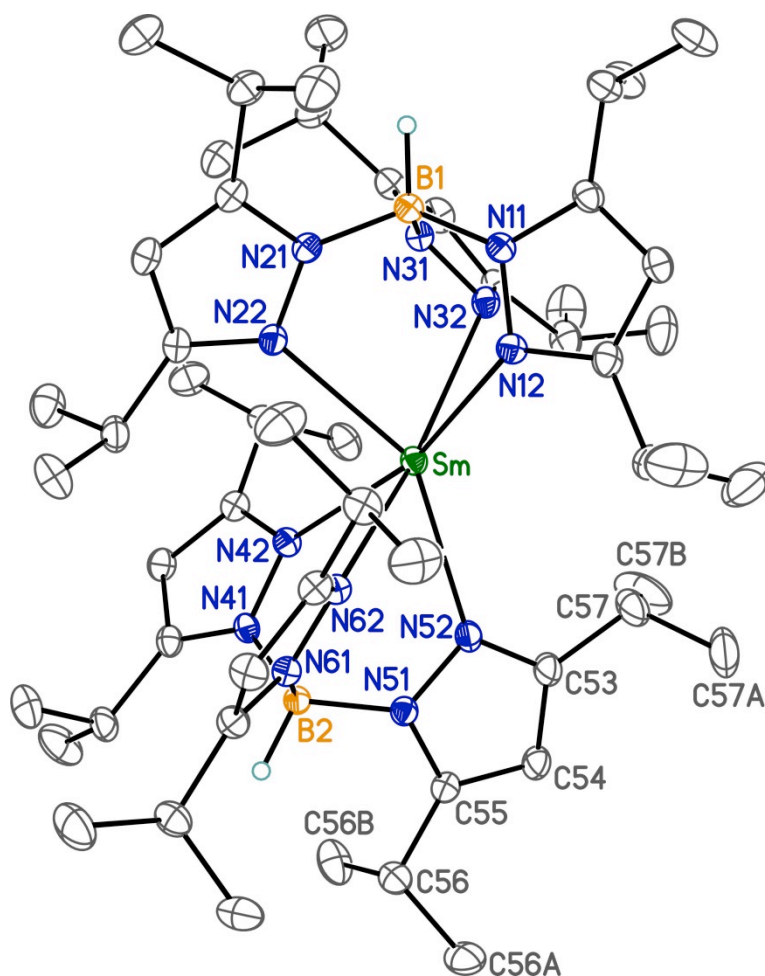

**Figure S4.** Perspective view of the  $[\{\text{HB}(3,5\text{-iPr}_2\text{-pyrazolyl})_3\}_2\text{Sm}]\cdot\text{CH}_3\text{CN}$  (**5**) molecule showing the atom labelling scheme. The lattice solvate acetonitrile is not shown. Non-hydrogen atoms are represented by Gaussian ellipsoids at the 30% probability level. Hydrogen atoms are shown with arbitrarily small thermal parameters for the B–H groups, and are not shown for the remaining groups.

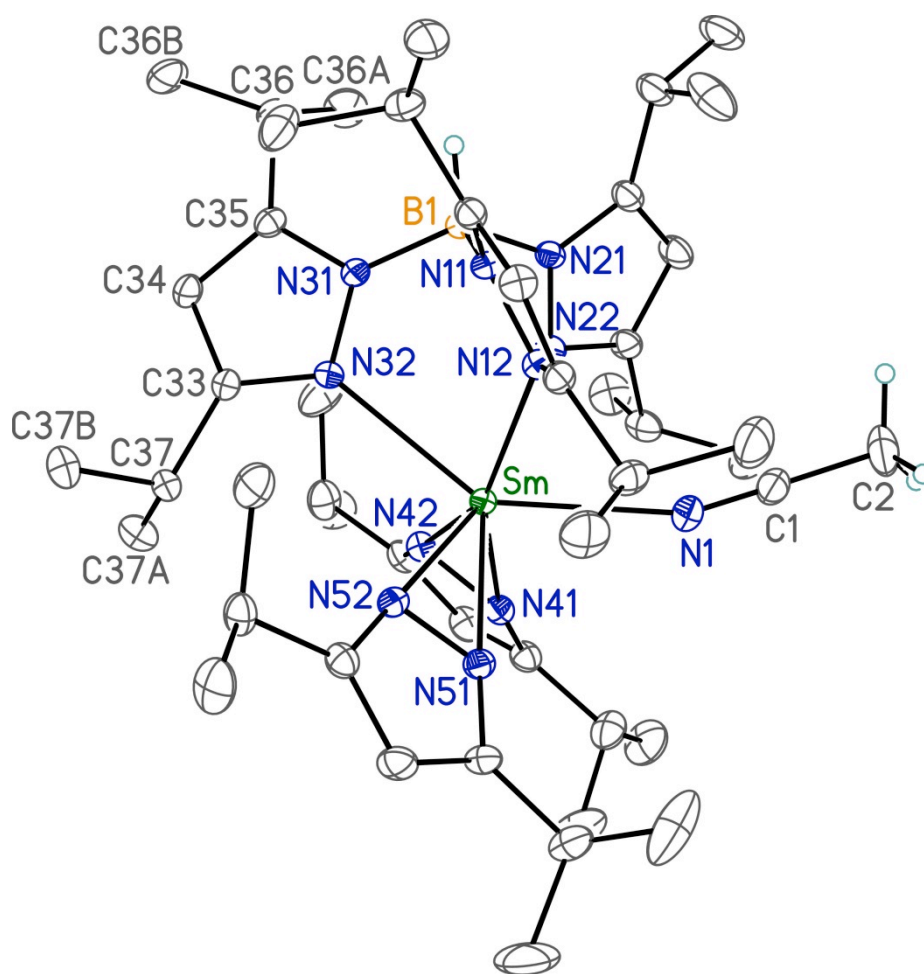

**Figure S5.** Perspective view of the  $[\{\text{HB}(3,5\text{-}i\text{Pr}_2\text{-pyrazolyl})_3\text{Sm}(3,5\text{-}i\text{Pr}_2\text{-pyrazolyl})_2(\text{NCMe})\}]$  (**6**) molecule showing the atom labelling scheme. Non-hydrogen atoms are represented by Gaussian ellipsoids at the 30% probability level. Hydrogen atoms attached to C2 and B1 are shown with arbitrarily small thermal parameters; all other hydrogens are not shown.

**Table S1. Interatomic Distances (Å) and Angles (°) for previously published Sm(Tp<sup>i</sup>Pr<sub>2</sub>)<sub>2</sub> and Tm(Tp<sup>i</sup>Pr<sub>2</sub>)<sub>2</sub>, and Sm(Tp<sup>i</sup>Pr<sub>2</sub>)<sub>2</sub>·CH<sub>3</sub>CN (5) and Yb(Tp<sup>i</sup>Pr<sub>2</sub>)<sub>2</sub> (4)**

|                                    | <b>Sm(A)<sup>a,b</sup></b> | <b>Sm(B)<sup>a,b</sup></b> | <b>Sm·CH<sub>3</sub>CN</b> | <b>Tm(A)<sup>a,b</sup></b> | <b>Tm(B)<sup>a,b</sup></b> | <b>Yb<sup>a</sup></b> | <b>Yb'<sup>a</sup></b> |
|------------------------------------|----------------------------|----------------------------|----------------------------|----------------------------|----------------------------|-----------------------|------------------------|
| Ln-N12                             | 2.638(2)                   | 2.664(2)                   | 2.642(2)                   | 2.534(2)                   | 2.538(2)                   | 2.528(2)              | 2.525(2)               |
| Ln-N22                             | 2.668(2)                   | 2.639(2)                   | 2.638(2)                   | 2.543(2)                   | 2.536(2)                   | 2.530(2)              | 2.522(2)               |
| Ln-N32                             | 2.645(2)                   | 2.664(2)                   | 2.735(2)                   | 2.553(2)                   | 2.534(2)                   | 2.550(2)              | 2.528(2)               |
| Ln-N42                             | 2.587(2)                   | 2.624(2)                   | 2.631(2)                   | 2.500(2)                   | 2.518(2)                   | 2.487(2)              | 2.498(2)               |
| Ln-N52                             | 2.680(2)                   | 2.643(2)                   | 2.634(2)                   | 2.599(2)                   | 2.554(2)                   | 2.589(2)              | 2.540(2)               |
| Ln-N62                             | 2.605(2)                   | 2.616(2)                   | 2.661(2)                   | 2.488(2)                   | 2.503(2)                   | 2.478(2)              | 2.502(2)               |
| Ln-N <sub>range</sub>              | 2.59 –<br>2.68             | 2.62 –<br>2.66             | 2.63 – 2.74                | 2.49 –<br>2.60             | 2.50 –<br>2.55             | 2.48 –<br>2.59        | 2.50 –<br>2.54         |
| <b>N-Ln-N(intra)</b>               |                            |                            |                            |                            |                            |                       |                        |
| N12-Ln-N22                         | 78.68(5)                   | 77.34(5)                   | 78.37(5)                   | 81.80(7)                   | 80.59(7)                   | 81.93(6)              | 84.11(6)               |
| N12-Ln-N32                         | 69.08(5)                   | 70.85(5)                   | 69.93(5)                   | 71.42(7)                   | 71.41(7)                   | 71.61(6)              | 71.61(6)               |
| N22-Ln-N32                         | 77.52(5)                   | 78.85(5)                   | 84.17(5)                   | 81.87(7)                   | 83.53(7)                   | 82.31(6)              | 81.04(6)               |
| N42-Ln-N52                         | 69.71(5)                   | 73.80(5)                   | 69.68(5)                   | 76.12(7)                   | 76.45(7)                   | 76.31(6)              | 73.14(6)               |
| N42-Ln-N62                         | 81.45(5)                   | 83.05(5)                   | 80.92(5)                   | 86.03(5)                   | 87.69(7)                   | 86.51(6)              | 88.33(6)               |
| N52-Ln-N62                         | 72.96(5)                   | 68.86(5)                   | 71.27(5)                   | 72.61(7)                   | 72.54(7)                   | 73.52(6)              | 76.79(6)               |
| <b>N-Ln-N(inter)<sub>cis</sub></b> |                            |                            |                            |                            |                            |                       |                        |
| N12-Ln-N52                         | 127.86(5)                  | 122.71(6)                  | 122.50(5)                  | 119.32(7)                  | 118.87(7)                  | 118.34(6)             | 116.55(6)              |
| N12-Ln-N62                         | 101.05(5)                  | 102.59(5)                  | 95.81(5)                   | 99.84(7)                   | 100.62(7)                  | 99.25(6)              | 98.28(6)               |
| N22-Ln-N42                         | 84.17(5)                   | 87.48(5)                   | 87.58(5)                   | 84.94(7)                   | 86.31(7)                   | 85.22(6)              | 87.90(6)               |
| N22-Ln-N62                         | 84.93(5)                   | 87.93(5)                   | 84.82(5)                   | 84.33(7)                   | 87.59(7)                   | 83.57(6)              | 86.10(6)               |
| N32-Ln-N42                         | 104.24(5)                  | 100.09(5)                  | 110.81(5)                  | 99.42(7)                   | 98.32(7)                   | 99.47(6)              | 100.06(6)              |
| N32-Ln-N52                         | 125.83(5)                  | 124.92(6)                  | 123.03(5)                  | 122.61(7)                  | 117.86(8)                  | 122.11(6)             | 118.23(6)              |

N–Ln–  
(inter)<sub>trans</sub>

|            |           |           |           |           |           |           |           |
|------------|-----------|-----------|-----------|-----------|-----------|-----------|-----------|
| N12–Ln–N42 | 162.34(5) | 163.49(5) | 165.82(5) | 164.40(7) | 164.10(7) | 165.21(6) | 169.24(6) |
| N22–Ln–N52 | 147.69(5) | 151.43(5) | 148.94(5) | 150.88(7) | 153.94(7) | 151.18(6) | 154.59(6) |
| N32–Ln–N62 | 161.18(6) | 166.20(6) | 163.50(5) | 164.60(7) | 168.91(8) | 164.13(6) | 164.32(6) |

Torsion  
Angles

|                  |           |           |           |           |           |         |         |
|------------------|-----------|-----------|-----------|-----------|-----------|---------|---------|
| Ln–N12N11–<br>B1 | 8.5(2)    | 33.3(2)   | 26.3(2)   | 32.6(3)   | 30.9(3)   | 32.2(2) | 3.3(2)  |
| Ln–N22N21–<br>B1 | 23.5(2)   | 28.7(2)   | 26.7(2)   | 22.5(3)   | 24.1(3)   | 20.8(2) | 23.9(2) |
| Ln–N32N31–<br>B1 | 32.8(2)   | 17.2(2)   | 62.4(2)   | 6.6(3)    | 3.9(3)    | 5.5(2)  | 30.3(2) |
| Ln–N42N41–<br>B2 | 22.8(2)   | 7.4(2)    | 23.6(2)   | 9.1(3)    | 11.6(3)   | 9.0(2)  | 28.0(2) |
| Ln–N52N51–<br>B2 | 1.3(2)    | 2.5(2)    | 3.8(2)    | 2.3(3)    | 0.6(3)    | 2.4(2)  | 0.1(2)  |
| Ln–N62N61–<br>B2 | 7.1(2)    | 30.7(2)   | 14.4(2)   | 22.8(3)   | 28.2(3)   | 22.0(2) | 11.5(2) |
| B1–Ln–B          | 148.34(5) | 151.79(5) | 151.19(5) | 151.13(7) | 153.40(7) | 151.1   | 153.9   |

<sup>a</sup>There are two independent molecules per asymmetric unit.

<sup>b</sup>A. Momin *et al. Inorg. Chem.*, 2014, **53**, 12066.
